# Supplementary material
Source: HighWire-hosted journal article supplement (https://oem.bmj.com/content/76/9/652)
Supplement: inline-supplementary-material-1 [file inline-supplementary-material-1.docx]

Appendix: AUDIT-C

The AUDIT-C is scored on a scale of 0-12 points, based on the three questions below. A score of 5 points or more (for men), and 4 points or more (for women) is an indication of problematic alcohol use, and requires the remaining seven questions of the 10-questions AUDIT instrument to be completed. The AUDIT-C score identifies at-risk drinkers who are not necessarily alcohol-dependent. If the respondent answers ‘never’ to the first question, the minimum score is ‘0’. In that case, one can stop screening.

| **Questions** | **Scoring system** | | | | | **Score** |
| --- | --- | --- | --- | --- | --- | --- |
| **0** | **1** | **2** | **3** | **4** |
| Q1: How often did you have a drink containing alcohol in the past year? | Never | Monthly or less | 2 to 4 times a month | 2 to 3 times a week | 4 or more times a week |  |
| Q2: How many drinks containing alcohol did you have on a typical day when you were drinking in the past year? | 1 to 2 drinks | 3 to 4 drinks | 5 to 6 drinks | 7 to 9 drinks | 10 or more drinks |  |
| Q3: How often did you have six or more drinks on one occasion in the past year? | Never | Less than monthly | Monthly | Weekly | Daily or almost daily |  |
| **TOTAL** | | | | | |  |

Kaarne T, Aalto M, Kuokkanen M, Seppä K. AUDIT-C, AUDIT-3 and AUDIT-QF in screening risky drinking among Finnish occupational health-care patients. *Drug Alcohol Rev* 2010;29:563-7.

Saunders JB, Aasland OG, Babor TF, De la Fuente JR, Grant M. Development of the alcohol use disorders identification test (AUDIT): WHO collaborative project on early detection of persons with harmful alcohol consumption‐II. *Addiction* 1993;88:791-804.
